# Supplementary material for: Differential Responses of Colorectal Cancer Cell Lines to Enterococcus faecalis’ Strains Isolated from Healthy Donors and Colorectal Cancer Patients
Source: J Clin Med. 2019 Mar 20;8(3):388. doi: 10.3390/jcm8030388 (PMC6463247; doi:10.3390/jcm8030388)
Supplement: Supplementary file 1 [file jcm-08-00388-s001.pdf]

## Supplementary material

### 1. Genotypic characterization of *E. faecalis* strains

**Table S1:** Genotypic characterization of the virulence factors of the different *E. faecalis* strains

| Virulencefactor | Identity     | Query/HSP        | Proteinfunction               | Accession no.     |
|-----------------|--------------|------------------|-------------------------------|-------------------|
| cOB1            | 99,63        | 819/819          |                               | 295112306         |
| camE            | 99,6         | 501/501          | sexpheromone cAM373 precursor | AF435438.1        |
| gelE            | 100          | 1530/1530        |                               | 355320029         |
| fsrB            | 99,59        | 729/729          | biofilmformation              | JN246675.1        |
| efaAfs          | 99,78        | 927/927          |                               | FP929058.1        |
| tpx             | 100          | 510/510          |                               | CP002621.1        |
| hylB            | 99,54        | 3015/3015        |                               | AE016830.1        |
| SrtA            | 100          | 735/735          |                               | CP002491.1        |
| hyla            | 98,64        | 4119/4119        |                               | AE016830.1        |
| cad             | 100          | 930/930          |                               | CP002621.1        |
| cCF10           | 100          | 828/828          |                               | CP002621.1        |
| ElrA            | 99,95        | 2172/2172        |                               | CP002491.1        |
| ace             | 99,52        | 1884/1884        | collagenadhesin precursor     | AF260876.1        |
| ebpC            | 100          | 1884/1884        |                               | CP002491.1        |
| ebpB            | 100          | 1431/1431        |                               | CP002491.1        |
| ebpA            | 100          | 3312/3312        |                               | CP002491.1        |
| gelE            | 99,87        | 1531/1530        |                               | CP002491.1        |
| ElrA            | 99,68        | 2172/2172        |                               | CP002621.1        |
| hyla            | 99,51        | 3266/3264        |                               | CP002491.1        |
| SrtA            | 99,46        | 735/735          |                               | CP002491.1        |
| camE            | 99,4         | 501/501          | sexpheromone cAM373 precursor | AF435439.1        |
| cad             | 100          | 930/930          |                               | CP002621.1        |
| ebpA            | 99,34        | 3312/3312        |                               | CP002621.1        |
| ebpB            | 99,3         | 1431/1431        |                               | AE016830.1        |
| ebpC            | 99,36        | 1884/1884        |                               | 295112306         |
| ace             | 97,19        | 1743/1743        | collagenadhesin precursor     | AF260879.1        |
| tpx             | 99,61        | 510/510          |                               | 295112306         |
| hylB            | 99,3         | 3015/3015        |                               | AE016830.1        |
| cCF10           | 99,88        | 828/828          |                               | CP002621.1        |
| efaAfs          | 100          | 927/927          |                               | FP929058.1        |
| cOB1            | 99,63        | 819/819          |                               | CP002621.1        |
| efaAfs          | 99,68        | 927/927          |                               | AE016830.1        |
| cOB1            | 99,76        | 819/819          |                               | CP002621.1        |
| ElrA            | 99,82        | 2172/2172        |                               | CP003726.1        |
| agg             | 100          | 3906/3906        | aggregationsubstance          | AF454824.1        |
| <b>cyiL</b>     | <b>100</b>   | <b>207/207</b>   |                               | <b>AY032999.1</b> |
| <b>cyiM</b>     | <b>100</b>   | <b>2982/2982</b> |                               | <b>AE016830.1</b> |
| <b>cyiB</b>     | <b>99,81</b> | <b>2145/2145</b> |                               | <b>AY032999.1</b> |
| camE            | 99,8         | 501/501          | sexpheromone cAM373 precursor | AF435439.1        |
| ace             | 96,71        | 1884/1884        | collagenadhesin precursor     | AF260877.1        |
| ebpC            | 99,58        | 1884/1884        |                               | CP002491.1        |
| ebpB            | 99,51        | 1431/1431        |                               | CP003726.1        |
| ebpA            | 99,7         | 3312/3312        |                               | 295112306         |
| SrtA            | 99,32        | 735/735          |                               | AE016830.1        |
| hyla            | 99,39        | 3266/3264        |                               | CP002491.1        |
| cad             | 99,35        | 930/930          |                               | AE016830.1        |
| cCF10           | 99,28        | 828/828          |                               | CP002621.1        |
| tpx             | 100          | 510/510          |                               | CP003726.1        |
| <b>espfm</b>    | <b>92,01</b> | <b>3555/4938</b> |                               | <b>CP003351.1</b> |
| gelE            | 100          | 1530/1530        |                               | CP003726.1        |
| fsrB            | 100          | 729/729          | biofilmformation              | CP003726.1        |

|        |       |           |                               |            |
|--------|-------|-----------|-------------------------------|------------|
| camE   | 99,8  | 501/501   | sexpheromone cAM373 precursor | AF435441.1 |
| cCF10  | 99,76 | 828/828   |                               | CP002621.1 |
| tpx    | 100   | 510/510   |                               | CP003726.1 |
| hylB   | 99,6  | 3015/3015 |                               | CP002621.1 |
| efaAfs | 100   | 927/927   |                               | CP003726.1 |
| cOB1   | 100   | 819/819   |                               | CP002491.1 |
| ebpA   | 99,97 | 3312/3312 |                               | CP003726.1 |
| ebpB   | 100   | 1431/1431 |                               | CP003726.1 |
| ebpC   | 100   | 1884/1884 |                               | CP002491.1 |
| ace    | 96,99 | 2025/2025 | collagenadhesin precursor     | AE016830.1 |
| ElrA   | 100   | 2172/2172 |                               | CP003726.1 |
| cad    | 99,78 | 930/930   |                               | CP002621.1 |
| SrtA   | 100   | 735/735   |                               | CP003726.1 |
| hyla   | 98,54 | 4119/4119 |                               | AE016830.1 |
| gelE   | 99,41 | 1528/1530 |                               | CP003726.1 |
| fsrB   | 100   | 729/729   | biofilmformation              | CP002621.1 |
| efaAfs | 99,89 | 927/927   |                               | CP002491.1 |
| camE   | 100   | 501/501   | sexpheromone cAM373 precursor | AF435441.1 |
| cOB1   | 99,63 | 819/819   |                               | CP002621.1 |
| SrtA   | 99,18 | 735/735   |                               | CP002491.1 |
| hyla   | 98,64 | 4119/4119 |                               | AE016830.1 |
| cad    | 100   | 930/930   |                               | CP003726.1 |
| cCF10  | 99,88 | 828/828   |                               | CP002621.1 |
| ace    | 97,24 | 1884/1884 | collagenadhesin precursor     | AF260877.1 |
| ebpC   | 100   | 1884/1884 |                               | CP002491.1 |
| ebpB   | 100   | 1431/1431 |                               | CP003726.1 |
| ebpA   | 100   | 3312/3312 |                               | CP003726.1 |
| hylB   | 99,57 | 3015/3015 |                               | CP002621.1 |
| ElrA   | 99,45 | 2172/2172 |                               | CP003726.1 |
| tpx    | 100   | 510/510   |                               | CP003726.1 |
| cOB1   | 99,63 | 819/819   |                               | 295112306  |
| camE   | 99,6  | 501/501   | sexpheromone cAM373 precursor | AF435438.1 |
| gelE   | 100   | 1530/1530 |                               | 355320029  |
| fsrB   | 99,59 | 729/729   | biofilmformation              | JN246675.1 |
| efaAfs | 99,78 | 927/927   |                               | FP929058.1 |
| tpx    | 100   | 510/510   |                               | CP002621.1 |
| hylB   | 99,54 | 3015/3015 |                               | AE016830.1 |
| SrtA   | 100   | 735/735   |                               | CP002491.1 |
| hyla   | 98,64 | 4119/4119 |                               | AE016830.1 |
| cad    | 100   | 930/930   |                               | CP002621.1 |
| cCF10  | 100   | 828/828   |                               | CP002621.1 |
| ElrA   | 99,95 | 2172/2172 |                               | CP002491.1 |
| ace    | 96,99 | 2025/2025 | collagenadhesin precursor     | AF260874.1 |
| ebpC   | 100   | 1884/1884 |                               | CP002491.1 |
| ebpB   | 100   | 1431/1431 |                               | CP002491.1 |
| ebpA   | 100   | 3312/3312 |                               | CP002491.1 |
| camE   | 99,4  | 501/501   | sexpheromone cAM373 precursor | AF435438.1 |
| ebpA   | 99,49 | 3312/3312 |                               | CP003726.1 |
| ebpB   | 99,65 | 1431/1431 |                               | CP003726.1 |
| ebpC   | 99,26 | 1884/1884 |                               | 295112306  |
| ace    | 97,35 | 1884/1884 | collagenadhesin precursor     | AF260876.1 |
| gelE   | 99,93 | 1530/1530 |                               | CP002621.1 |
| fsrB   | 99,86 | 729/729   | biofilmformation              | CP002621.1 |
| tpx    | 99,61 | 510/510   |                               | AE016830.1 |
| cOB1   | 98,53 | 819/819   |                               | AE016830.1 |
| efaAfs | 99,78 | 927/927   |                               | FP929058.1 |
| ElrA   | 98,71 | 2172/2172 |                               | CP003726.1 |
| hylB   | 99,54 | 3015/3015 |                               | CP002621.1 |
| SrtA   | 99,05 | 735/735   |                               | CP002491.1 |
| hyla   | 98,93 | 3266/3264 |                               | CP002491.1 |
| cCF10  | 99,76 | 828/828   |                               | CP002621.1 |

|        |       |           |                               |            |
|--------|-------|-----------|-------------------------------|------------|
| cad    | 99,89 | 930/930   |                               | CP002621.1 |
| camE   | 100   | 501/501   | sexpheromone cAM373 precursor | AF435438.1 |
| gelE   | 99,87 | 1530/1530 |                               | CP002491.1 |
| hyla   | 98,66 | 4119/4119 |                               | AE016830.1 |
| tpx    | 99,8  | 510/510   |                               | CP003726.1 |
| SrtA   | 99,46 | 735/735   |                               | CP002491.1 |
| cad    | 99,35 | 930/930   |                               | AE016830.1 |
| cOB1   | 99,63 | 819/819   |                               | CP002621.1 |
| agg    | 95,69 | 3692/3906 | aggregationsubstance          | AF454824.1 |
| ElrA   | 99,59 | 2172/2172 |                               | CP003726.1 |
| efaAfs | 100   | 927/927   |                               | FP929058.1 |
| cCF10  | 100   | 828/828   |                               | FP929058.1 |
| ebpA   | 99,37 | 3312/3312 |                               | CP003726.1 |
| ebpB   | 99,65 | 1431/1431 |                               | CP002491.1 |
| ebpC   | 99,68 | 1884/1884 |                               | CP002491.1 |
| ace    | 100   | 1743/1743 | collagenadhesin precursor     | AF260879.1 |

## 2. GC-MS analysis of SCFAs

The MS acquisition was carried out in single ion monitoring (SIM) recording the characteristic ions of monitored SCFAs (Table 2). The quantitative SCFAs' evaluation was carried out by ratios between the area abundances of the analyses with the area abundances of respective labeled internal standards (isotopic dilution method). The ionic signals and the reference internal standard, used for the quantitation of each SCFA, were reported in Table 2. 3 mL of pre-fermented medium sample was added of 50 µL of ISTDs mixture, 1 mL of tert-butyl methyl ether and 50 µL of 1 M HCl solution in 15 mL centrifuge tube. Then, each tube was shaken in vortex apparatus for 2 minutes, centrifuged at 10000 rpm for 5 minutes, and finally the solvent layer was transferred in auto sampler vial and analyzed by GC-MS method. Each sample has been prepared and processed, by the previously described method, three times.

**Table s2:** Ionic signal used for quali/quantitation and relative ISTD of each SCFA acquired by the GC-MS method.

| SCFAs              | Quan. Ion | Qual. ion | ISTD                          |
|--------------------|-----------|-----------|-------------------------------|
| <b>Acetic</b>      | 60        | -         | [2H <sub>3</sub> ]Acetic      |
| <b>Propionic</b>   | 74        | 73        | [2H <sub>3</sub> ]Propionic   |
| <b>iso-Butyric</b> | 73        | 88        | [2H <sub>7</sub> ]iso-Butyric |
| <b>Butyric</b>     | 60        | 73        | [2H <sub>3</sub> ]Propionic   |
| <b>iso-Valeric</b> | 60        | 87        | [2H <sub>9</sub> ]iso-Valeric |
| <b>Valeric</b>     | 60        | 87        | [2H <sub>9</sub> ]iso-Valeric |

The cell cycle phase distribution (propidium iodide staining) has been estimated by flow cytometry. For that, we evaluated the effects of 48 hours exposure of bacterial metabolites on CLR1790 cells (considered as no tumor cell controls), and on HCT116 cells, which were the more responsive cells to the bacterial metabolites among the others. The results did not show any accumulation in G0/G1, S or G2/M phases induced by bacterial metabolites (Figure 1). However, in accordance with the previous MTT assay (see the manuscript), we noted a trend to decreasing G0/G1 and increasing S phases, mainly with the metabolites of the EFH03 strain, which goes. Of note, we have documented that EFH03 was the most effectiveness strain on decreasing the cancer cell proliferation.

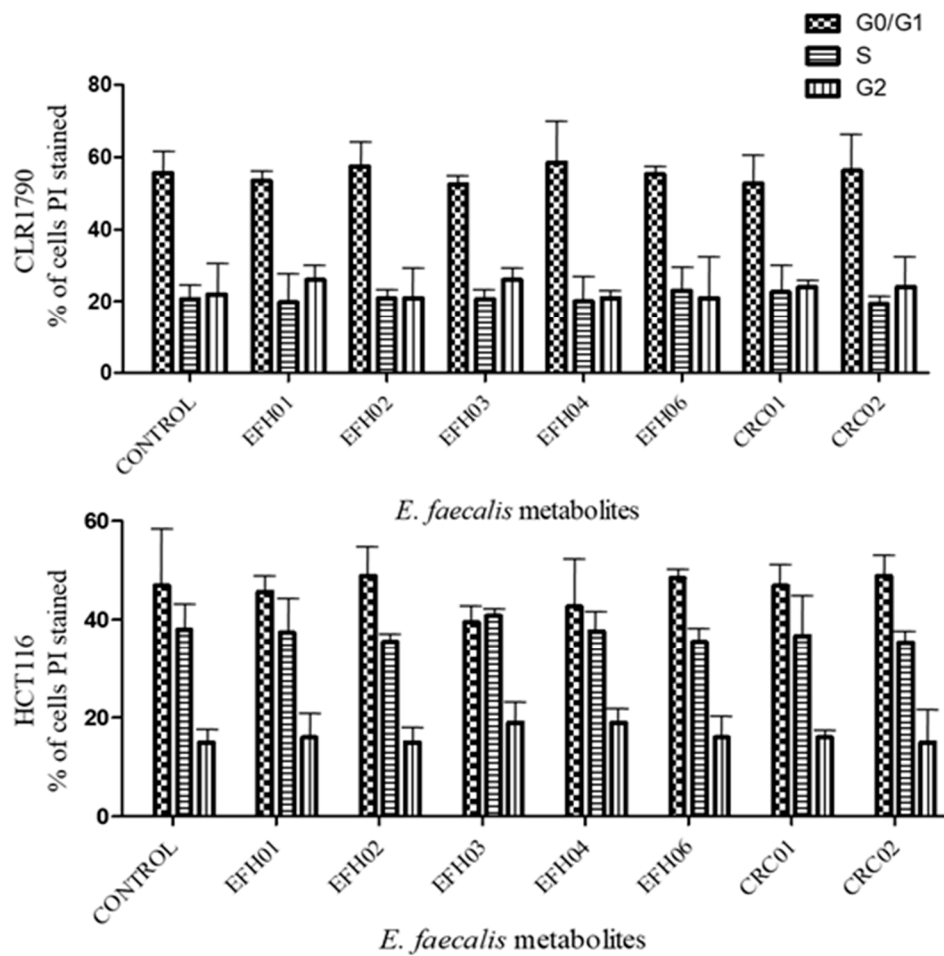

**Figure s1:** Cell cycle phase distribution of CLR1790 and HCT-116 cell lines after 48 hours of bacterial metabolites exposure. In total, 150 000 cells/well were seeded in multiwell dishes and exposed to bacterial metabolites. After medium removal, 400µl of solution containing 50 µg/mL propidium iodide, 0.1% w/v trisodium citrate and 0.1% NP40 was added. Samples were then incubated for 30 min at 4°C in the dark and nuclei analyzed with a FACS Canto flow cytometer (Becton Dickinson, Franklin Lakes, New Jersey, USA). All the experiments have been made in triplicate. Data are shown as mean  $\pm$  sd.
